# Supplementary material
Source: PubMed Central journal article supplement (PMC3277287)
Supplement: NIHMS349284-supplement-1.pdf [file NIHMS349284-supplement-1.pdf]

**SUPPLEMENTAL MATERIAL**

Sabatine: Biomarkers of Cardiovascular Stress in Stable CAD  
**Supplemental Methods**

*Patient population*

In the overall PEACE trial, a total of 8290 patients with documented stable coronary artery disease and preserved left ventricular ejection fraction were randomized at 187 clinical centers in the United States, Canada, and Europe to trandolapril or placebo from November 1996 through June 2000. Subjects were followed for a median of 4.8 years. As part of the study protocol, a sample of venous blood was obtained in EDTA-treated tubes at the time of enrollment. Participation in the biomarker substudy was at the discretion of each clinical center and there were no clinically relevant differences between patients included in the substudy and the overall trial population (Supplemental Table 1). The plasma component was aspirated and frozen at -20 °C at individual centers. Within 3 months after collection, plasma samples were shipped on dry ice to a central laboratory for storage at -70 °C or colder until thawed for determination of biomarkers.

## Sabatine: Biomarkers of Cardiovascular Stress in Stable CAD

### *Biomarker analyses*

Levels of MR-proANP, MR-proADM, CT-proET-1, and copeptin were determined using the Time-Resolved-Amplified-Cryptate-Emission (TRACE) technology on the Kryptor Compact analyzers (B.R.A.H.M.S. GmbH, Henningsdorf, Germany). NT-proBNP levels were determined with an electrochemiluminescence immunoassay on a Modular platform (Roche Diagnostics, Bsel, Switzerland). Cardiac troponin T (cTnT) levels were measured with a highly sensitive assay on an autoanalyzer (cobas e 411, Roche Diagnostics, Penzberg, Germany).

### *Outcomes*

All clinical events were confirmed by a review of medical records. Cardiovascular death, MI, and stroke underwent blinded review by an outcomes committee. Heart failure was classified by centrally trained local staff and confirmed by staff at the coordinating center through a review of hospital records. For an event to be classified as heart failure, hospitalization with a primary cause of heart failure was required.

### *Statistical analyses*

As described by Pencina and colleagues, the integrated discrimination improvement (IDI) is a method to quantify the differences in the probabilities for events and non-events based on the addition of the new biomarkers to the model and can be viewed as difference between the improvement in average sensitivity and any potential increase in average “one minus specificity”. The net re-classification improvement (NRI) is the probability that patients are appropriately assigned to a higher or lower risk. We calculated NRI using Harrell’s technique, as programmed in R, which evaluates the change in the estimated risk as a continuous variable and therefore is not dependent on *a priori* categorization.

**Supplemental Table 1.** Baseline Characteristics of Patients in the PEACE Trial

| <b>Baseline Characteristic</b>  | <b>All patients<br/>(n=8290)</b> | <b>Patients in the<br/>biomarker substudy<br/>(n=3717)</b> | <b>Patients not in the<br/>biomarker substudy<br/>(n=4573)</b> |
|---------------------------------|----------------------------------|------------------------------------------------------------|----------------------------------------------------------------|
| Age, y                          | 64.3±8.2                         | 64.1±8.2                                                   | 64.5±8.2                                                       |
| Female sex                      | 1494 (18.0)                      | 701 (18.9)                                                 | 793 (17.3)                                                     |
| Weight, kg                      | 83.4±15.7                        | 83.9±15.7                                                  | 83.1±15.7                                                      |
| Hypertension                    | 3764 (45.4)                      | 1658 (44.6)                                                | 2106 (46.1)                                                    |
| Diabetes                        | 1380 (16.7)                      | 602 (16.2)                                                 | 778 (17.0)                                                     |
| Current smoker                  | 1177 (14.2)                      | 564 (15.2)                                                 | 613 (13.4)                                                     |
| Prior MI                        | 4552 (55.0)                      | 2087 (56.2)                                                | 2465 (54.0)                                                    |
| Prior PCI or CABG               | 5971 (72.1)                      | 2697 (72.6)                                                | 3274 (71.7)                                                    |
| Aspirin                         | 7519 (90.7)                      | 3389 (91.2)                                                | 4130 (90.4)                                                    |
| Beta-blocker                    | 4965 (59.9)                      | 2303 (62.0)                                                | 2662 (58.3)                                                    |
| Lipid-lowering therapy          | 5801 (70.0)                      | 2667 (71.8)                                                | 3134 (68.6)                                                    |
| SBP, mmHg                       | 133.4±16.6                       | 133.4±16.8                                                 | 133.5±16.4                                                     |
| DBP, mmHg                       | 77.7±9.7                         | 78.1±10.0                                                  | 77.4±9.6                                                       |
| GFR, ml/min/1.73 m <sup>2</sup> | 77.6±19.1                        | 77.9±19.4                                                  | 77.3±18.8                                                      |
| ApoB, mg/dl                     | 107.2±23.1                       | 107.2±23.1                                                 | 106.8±26.3                                                     |
| ApoA, mg/dl                     | 138.2±24.6                       | 138.2±24.6                                                 | 133.2±21.4                                                     |
| LVEF, %                         | 58.2±9.4                         | 58.7±9.6                                                   | 57.7±9.1                                                       |

Data presented are mean ±SD for normally distributed continuous variables and n (%) for dichotomous variables. CABG = coronary artery bypass grafting; DBP = diastolic blood pressure; GFR = glomerular filtration rate; LVEF = left ventricular ejection fraction; MI = myocardial infarction; PCI = percutaneous coronary intervention; SBP = systolic blood pressure.

**Supplemental Table 2.** Biomarker Assay Specifications

| <b>Biomarker</b>                                      | <b>MR-proANP</b>                     | <b>MR-proADM</b>                                                                   | <b>CT-proET-1</b>                     | <b>Copeptin</b>                                             |
|-------------------------------------------------------|--------------------------------------|------------------------------------------------------------------------------------|---------------------------------------|-------------------------------------------------------------|
| <b>Assay specifications</b>                           |                                      |                                                                                    |                                       |                                                             |
| Units of measurement                                  | pmol/L                               | nmol/L                                                                             | pmol/L                                | pmol/L                                                      |
| Detection limit                                       | 2.1                                  | 0.05                                                                               | 3                                     | 5                                                           |
| Direct measurement upper limit                        | 1000                                 | 10                                                                                 | 500                                   | 500                                                         |
| Coefficient of variation                              | 20-80 pmol/L: <8%<br>>80 pmol/L: <5% | 0.2-0.5 nmol/L: <20%<br>0.5-2.0 nmol/L: <11%<br>2-6 nmol/L: <10%<br>>6 nmol/L: <6% | 40-80 pmol/L: <10%<br>>80 pmol/L: <6% | 15-20 pmol/L: <15%<br>20-50 pmol/L: <13%<br>>50 pmol/L: <8% |
| <b>Values in Healthy Population*</b>                  |                                      |                                                                                    |                                       |                                                             |
| Median                                                | 46.1                                 | 0.39                                                                               | 45.5                                  | 5.0                                                         |
| 97.5 percentile                                       | 163.9                                | 0.52                                                                               | 73.9                                  | 17.4                                                        |
| <b>Values in PEACE</b>                                |                                      |                                                                                    |                                       |                                                             |
| Median (25 <sup>th</sup> -75 <sup>th</sup> %ile)      | 90.45<br>(63.68-128.3)               | 0.5301<br>(0.4486-0.6353)                                                          | 47.82<br>(39.04-57.02)                | 6.467<br>(0-10.67)                                          |
| Mean±SD of log transformed values <sup>†</sup>        | 4.627±0.460                          | 2.356±0.016                                                                        | 4.036±0.301                           | 2.765±0.422                                                 |
| <b>Values in Heart Failure Population<sup>†</sup></b> |                                      |                                                                                    |                                       |                                                             |
| Median (25 <sup>th</sup> -75 <sup>th</sup> %ile)      | 206<br>(127-322)                     | 0.75<br>(0.58-0.97)                                                                | 81<br>(64-105)                        | 13.8<br>(7.6-24.2)                                          |

\*Data are from the package inserts for each assay.

<sup>†</sup> Raw values were natural log transformed. For MR-proADM, as the raw values were <1, a constant (10) was added to all values prior to log transformation.

**Supplemental Table 3.** Baseline Characteristics by MR-proANP Quartiles

| Baseline Characteristic         | Quartiles of MR-proANP (pmol/L) |                        |                        |                   | P value |
|---------------------------------|---------------------------------|------------------------|------------------------|-------------------|---------|
|                                 | ≤63.68<br>(n=930)               | 63.69-90.45<br>(n=929) | 90.46-128.3<br>(n=930) | ≥128.4<br>(n=928) |         |
| Age, y                          | 59.5±6.8                        | 62.1±7.3               | 65.3±7.5               | 69.6±7.4          | <0.001  |
| Female sex                      | 140 (15.1)                      | 160 (17.2)             | 193 (20.8)             | 208 (22.4)        | <0.001  |
| Weight, kg                      | 87.5±16.0                       | 84.8±15.0              | 83.1±15.7              | 80.4±15.1         | <0.001  |
| Hypertension                    | 363 (39.0)                      | 376 (40.5)             | 447 (48.1)             | 472 (50.9)        | <0.001  |
| Diabetes                        | 179 (19.2)                      | 152 (16.4)             | 135 (14.5)             | 136 (14.7)        | 0.004   |
| Current smoker                  | 228 (24.5)                      | 165 (17.8)             | 95 (10.2)              | 76 (8.2)          | <0.001  |
| Prior MI                        | 519 (55.8)                      | 517 (55.7)             | 510 (54.9)             | 541 (58.3)        | 0.36    |
| Prior PCI or CABG               | 661 (71.1)                      | 676 (72.8)             | 669 (72.0)             | 691 (74.5)        | 0.15    |
| Aspirin                         | 865 (93.0)                      | 865 (93.1)             | 842 (90.7)             | 817 (88.0)        | <0.001  |
| Beta-blocker                    | 419 (45.1)                      | 531 (57.2)             | 646 (69.6)             | 707 (76.2)        | <0.001  |
| Lipid-lowering therapy          | 681 (73.3)                      | 692 (74.5)             | 661 (71.2)             | 633 (68.2)        | 0.005   |
| SBP, mmHg                       | 130.7±14.7                      | 131.6±16.2             | 133.9±16.9             | 137.3±18.5        | <0.001  |
| DBP, mmHg                       | 80.0±9.8                        | 78.2±10.1              | 77.6±9.6               | 76.7±10.1         | <0.001  |
| GFR, ml/min/1.73 m <sup>2</sup> | 84.8±20.6                       | 80.6±18.6              | 76.1±17.2              | 70.2±17.9         | <0.001  |
| ApoB, mg/dl                     | 109.8±23.4                      | 108.2±23.8             | 106.0±22.3             | 104.7±22.4        | <0.001  |
| ApoA, mg/dl                     | 137.2±23.4                      | 137.3±23.6             | 139.3±25.0             | 139.2±26.3        | 0.12    |
| LVEF, %                         | 59.5±9.6                        | 59.3±9.6               | 58.7±9.8               | 57.5±9.4          | <0.001  |

Data presented are mean ±SD for normally distributed continuous variables and n (%) for dichotomous variables. BMI = body mass index; CABG = coronary artery bypass grafting; DBP = diastolic blood pressure; GFR = glomerular filtration rate; LVEF = left ventricular ejection fraction; MI = myocardial infarction; PCI = percutaneous coronary intervention; SBP = systolic blood pressure.

**Supplemental Table 4.** Baseline Characteristics by MR-proADM Quartiles

| Baseline Characteristic        | Quartiles of MR-proADM (nmol/L) |                          |                          |                    | P value |
|--------------------------------|---------------------------------|--------------------------|--------------------------|--------------------|---------|
|                                | ≤0.4486<br>(n=930)              | 0.4487-0.5301<br>(n=930) | 0.5302-0.6353<br>(n=928) | ≥0.6354<br>(n=929) |         |
| Age, y                         | 60.1 ± 7.0                      | 62.5 ± 7.6               | 65.2 ± 7.8               | 68.7 ± 7.6         | <0.001  |
| Female sex                     | 148 (15.9)                      | 125 (13.4)               | 173 (18.6)               | 255 (27.4)         | <0.001  |
| Weight, kg                     | 80.6 ± 14.5                     | 83.8 ± 14.6              | 85.1 ± 16.0              | 86.3 ± 16.8        | <0.001  |
| Hypertension                   | 377 (40.5)                      | 350 (37.6)               | 435 (46.9)               | 496 (53.4)         | <0.001  |
| Diabetes                       | 148 (15.9)                      | 133 (14.3)               | 139 (15.0)               | 182 (19.6)         | 0.03    |
| Current smoker                 | 145 (15.6)                      | 130 (14.0)               | 160 (17.2)               | 129 (13.9)         | 0.75    |
| Prior MI                       | 506 (54.4)                      | 534 (57.4)               | 526 (56.7)               | 521 (56.1)         | 0.54    |
| Prior PCI or CABG              | 705 (75.8)                      | 688 (74.0)               | 649 (69.9)               | 655 (70.6)         | 0.003   |
| Aspirin                        | 863 (92.8)                      | 866 (93.1)               | 840 (90.6)               | 820 (88.4)         | <0.001  |
| Beta-blocker                   | 525 (56.5)                      | 554 (59.6)               | 601 (64.8)               | 623 (67.1)         | <0.001  |
| Lipid-lowering therapy         | 713 (76.8)                      | 689 (74.1)               | 649 (70.1)               | 616 (66.4)         | <0.001  |
| SBP, mmHg                      | 131.4 ± 16.1                    | 131.0 ± 16.3             | 134.5 ± 16.9             | 136.6 ± 17.4       | <0.001  |
| DBP, mmHg                      | 78.8 ± 10.2                     | 77.9 ± 9.8               | 78.5 ± 9.6               | 77.2 ± 10.6        | 0.01    |
| GFR, ml/min/1.73m <sup>2</sup> | 84.9 ± 20.0                     | 81.2 ± 18.5              | 77.4 ± 17.2              | 68.2 ± 17.6        | <0.001  |
| ApoB, mg/dl                    | 106.9 ± 21.7                    | 106.2 ± 22.2             | 108.5 ± 24.8             | 107.2 ± 23.4       | 0.64    |
| ApoA, mg/dl                    | 138.1 ± 24.5                    | 136.7 ± 23.3             | 138.4 ± 24.4             | 139.7 ± 26.1       | 0.08    |
| LVEF, %                        | 58.9 ± 9.6                      | 58.6 ± 9.4               | 59.0 ± 9.9               | 58.5 ± 9.7         | 0.39    |

See footnote to Supplemental Table 3 for details.

**Supplemental Table 5.** Baseline Characteristics by CT-proET-1 Quartiles

| Baseline Characteristic         | Quartiles of CT-proET-1 (pmol/L) |                        |                        |                   | P value |
|---------------------------------|----------------------------------|------------------------|------------------------|-------------------|---------|
|                                 | ≤39.04<br>(n=930)                | 39.05-47.82<br>(n=929) | 47.83-57.02<br>(n=929) | ≥57.03<br>(n=929) |         |
| Age, y                          | 62.0±7.6                         | 63.1±8.0               | 64.6±8.2               | 66.8±8.0          | <0.001  |
| Female sex                      | 191 (20.5)                       | 155 (16.7)             | 145 (15.6)             | 210 (22.6)        | 0.37    |
| Weight, kg                      | 82.3±15.5                        | 84.3±15.4              | 84.4±15.4              | 84.8±16.1         | 0.001   |
| Hypertension                    | 384 (41.3)                       | 385 (41.4)             | 403 (43.4)             | 486 (52.3)        | <0.001  |
| Diabetes                        | 162 (17.4)                       | 125 (13.5)             | 153 (16.5)             | 162 (17.4)        | 0.57    |
| Current smoker                  | 127 (13.7)                       | 132 (14.2)             | 140 (15.1)             | 165 (17.8)        | 0.01    |
| Prior MI                        | 493 (53.0)                       | 551 (59.3)             | 516 (55.6)             | 527 (56.7)        | 0.31    |
| Prior PCI or CABG               | 701 (75.4)                       | 685 (73.7)             | 647 (69.7)             | 664 (71.5)        | 0.02    |
| Aspirin                         | 859 (92.4)                       | 854 (91.9)             | 852 (91.9)             | 824 (88.7)        | 0.008   |
| Beta-blocker                    | 557 (59.9)                       | 567 (61.0)             | 573 (61.8)             | 606 (65.2)        | 0.02    |
| Lipid-lowering therapy          | 699 (75.2)                       | 676 (72.8)             | 650 (70.1)             | 642 (69.1)        | 0.001   |
| SBP, mmHg                       | 131.1±16.1                       | 132.9±16.5             | 133.4±17.2             | 136.0±17.2        | <0.001  |
| DBP, mmHg                       | 77.8±9.7                         | 78.7±10.1              | 78.4±9.6               | 77.7±10.4         | 0.61    |
| GFR, ml/min/1.73 m <sup>2</sup> | 84.6±21.2                        | 80.6±17.3              | 76.9±17.9              | 69.6±17.6         | <0.001  |
| ApoB, mg/dl                     | 106.0±22.6                       | 107.0±22.0             | 107.0±23.3             | 108.7±24.3        | 0.04    |
| ApoA, mg/dl                     | 139.6±25.3                       | 139.1±24.5             | 137.3±24.7             | 136.9±23.8        | 0.01    |
| LVEF, %                         | 58.7±9.5                         | 59.2±9.7               | 58.8±9.7               | 58.3±9.7          | 0.21    |

See footnote to Supplemental Table 3 for details.



**Supplemental Table 6.** Baseline Characteristics by Copeptin Quartiles

| Baseline Characteristic         | Quartiles of Copeptin (pmol/L) |                    |                        |                   | P value |
|---------------------------------|--------------------------------|--------------------|------------------------|-------------------|---------|
|                                 | 0<br>(n=1382)                  | 5-6.467<br>(n=477) | 6.468-10.67<br>(n=929) | ≥10.68<br>(n=929) |         |
| Age, y                          | 63.7±7.9                       | 63.7±8.3           | 63.4±8.2               | 65.7±8.3          | <0.001  |
| Female sex                      | 342 (24.8)                     | 89 (18.7)          | 143 (15.4)             | 127 (13.7)        | <0.001  |
| Weight, kg                      | 82.3±15.2                      | 84.6±15.9          | 84.6±15.9              | 85.4±15.7         | <0.001  |
| Hypertension                    | 629 (44.1)                     | 218 (45.7)         | 380 (40.9)             | 451 (48.6)        | 0.20    |
| Diabetes                        | 205 (14.8)                     | 78 (16.4)          | 135 (14.5)             | 184 (19.8)        | 0.01    |
| Current smoker                  | 183 (13.2)                     | 64 (13.4)          | 176 (19.0)             | 141 (15.2)        | 0.02    |
| Prior MI                        | 754 (54.6)                     | 268 (56.2)         | 539 (58.0)             | 526 (56.7)        | 0.18    |
| Prior PCI or CABG               | 1011 (73.2)                    | 338 (70.9)         | 684 (73.6)             | 664 (71.6)        | 0.60    |
| Aspirin                         | 1273 (92.1)                    | 439 (92.0)         | 853 (91.9)             | 824 (88.8)        | 0.02    |
| Beta-blocker                    | 849 (61.4)                     | 292 (61.2)         | 583 (62.8)             | 579 (62.4)        | 0.52    |
| Lipid-lowering therapy          | 1006 (72.9)                    | 348 (73.0)         | 666 (71.8)             | 647 (69.7)        | 0.11    |
| SBP, mmHg                       | 132.7±16.9                     | 134.3±17.0         | 132.0±16.4             | 135.3±16.9        | 0.01    |
| DBP, mmHg                       | 77.9±9.8                       | 78.9±9.9           | 78.2±10.1              | 78.0±10.2         | 0.99    |
| GFR, ml/min/1.73 m <sup>2</sup> | 80.0±18.8                      | 78.9±18.9          | 78.6±20.0              | 73.7±19.3         | <0.001  |
| ApoB, mg/dl                     | 107.0±23.1                     | 108.1±24.0         | 105.8±21.7             | 108.4±23.8        | 0.67    |
| ApoA, mg/dl                     | 140.4±25.7                     | 138.2±23.0         | 137.6±24.1             | 135.7±23.9        | <0.001  |
| LVEF, %                         | 59.3±9.7                       | 58.4±9.1           | 58.6±9.6               | 58.3±9.7          | 0.01    |

See footnote to Supplemental Table 3 for details.

**Supplemental Table 7.** Correlation between biomarkers

|            | MR-proANP | MR-proADM | CT-proET-1 | Copeptin | NT-proBNP | cTnT |
|------------|-----------|-----------|------------|----------|-----------|------|
| MR-proANP  | ...       | 0.44      | 0.30       | 0.12     | 0.76      | 0.37 |
| MR-proADM  | <0.001    | ...       | 0.63       | 0.23     | 0.38      | 0.30 |
| CT-proET-1 | <0.001    | <0.001    | ...        | 0.21     | 0.25      | 0.22 |
| Copeptin   | <0.001    | <0.001    | <0.001     | ...      | 0.10      | 0.20 |
| NT-proBNP  | <0.001    | <0.001    | <0.001     | <0.001   | ...       | 0.35 |
| cTnT       | <0.001    | <0.001    | <0.001     | <0.001   | <0.001    | ...  |

Values above and to the right of the diagonal line of identity are Spearman's correlation coefficients, values to the left and below are the corresponding P values.

**Supplemental Table 8.** Association of biomarker levels and individual components of primary outcome in the placebo arm

| Biomarker  | Model             | CV Death            |         | Heart Failure       |         |
|------------|-------------------|---------------------|---------|---------------------|---------|
|            |                   | HR (95% CI)         | P value | HR (95% CI)         | P value |
| MR-proANP  | <i>Unadjusted</i> | 2.12<br>(1.69-2.67) | <0.001  | 2.52<br>(1.96-3.23) | <0.001  |
|            | <i>Adjusted</i>   | 1.76<br>(1.31-2.37) | <0.001  | 2.35<br>(1.72-3.20) | <0.001  |
| MR-proADM  | <i>Unadjusted</i> | 1.74<br>(1.52-1.99) | <0.001  | 1.68<br>(1.44-1.96) | <0.001  |
|            | <i>Adjusted</i>   | 1.56<br>(1.27-1.90) | <0.001  | 1.47<br>(1.17-1.84) | 0.001   |
| CT-proET-1 | <i>Unadjusted</i> | 2.07<br>(1.55-2.77) | <0.001  | 2.13<br>(1.55-2.93) | <0.001  |
|            | <i>Adjusted</i>   | 1.52<br>(1.10-2.10) | 0.012   | 1.70<br>(1.20-2.42) | 0.003   |
| Copeptin   | <i>Unadjusted</i> | 1.29<br>(1.03-1.62) | 0.026   | 1.23<br>(0.96-1.58) | 0.10    |
|            | <i>Adjusted</i>   | 1.03<br>(0.80-1.32) | 0.83    | 1.08<br>(0.83-1.40) | 0.57    |

Of the 1868 patients allocated to placebo, 67 experienced cardiovascular death and 56 heart failure. HR is per 1-SD increase in the log-transformed value of the biomarker. Each biomarker was analyzed separately.

**Supplemental Table 9.** Association of biomarker levels and other outcomes in the placebo arm

| Biomarker  | Model             | All-Cause Death     |         | Acute MI            |         | Acute Stroke        |         | Revascularization   |         |
|------------|-------------------|---------------------|---------|---------------------|---------|---------------------|---------|---------------------|---------|
|            |                   | HR (95% CI)         | P value |
| MR-proANP  | <i>Unadjusted</i> | 1.59<br>(1.37-1.86) | <0.001  | 1.10<br>(0.91-1.33) | 0.31    | 1.50<br>(1.11-2.03) | 0.008   | 0.96<br>(0.87-1.06) | 0.44    |
|            | <i>Adjusted</i>   | 1.30<br>(1.06-1.58) | 0.011   | 1.07<br>(0.84-1.35) | 0.59    | 1.51<br>(1.01-2.24) | 0.043   | 0.96<br>(0.84-1.10) | 0.55    |
| MR-proADM  | <i>Unadjusted</i> | 1.57<br>(1.41-1.74) | <0.001  | 1.27<br>(1.08-1.50) | 0.003   | 1.12<br>(0.84-1.51) | 0.44    | 0.98<br>(0.88-1.09) | 0.72    |
|            | <i>Adjusted</i>   | 1.41<br>(1.22-1.64) | <0.001  | 1.19<br>(0.96-1.48) | 0.11    | 0.91<br>(0.65-1.27) | 0.58    | 0.95<br>(0.84-1.08) | 0.43    |
| CT-proET-1 | <i>Unadjusted</i> | 1.56<br>(1.29-1.89) | <0.001  | 1.25<br>(1.00-1.55) | 0.046   | 0.94<br>(0.69-1.27) | 0.69    | 0.92<br>(0.83-1.02) | 0.12    |
|            | <i>Adjusted</i>   | 1.29<br>(1.05-1.59) | 0.016   | 1.12<br>(0.89-1.40) | 0.35    | 0.84<br>(0.63-1.12) | 0.23    | 0.91<br>(0.81-1.01) | 0.08    |
| Copeptin   | <i>Unadjusted</i> | 1.23<br>(1.06-1.44) | 0.007   | 1.11<br>(0.92-1.33) | 0.27    | 0.92<br>(0.67-1.28) | 0.64    | 1.00<br>(0.90-1.11) | 0.96    |
|            | <i>Adjusted</i>   | 1.06<br>(0.90-1.26) | 0.48    | 1.01<br>(0.83-1.24) | 0.88    | 0.84<br>(0.60-1.17) | 0.30    | 0.98<br>(0.88-1.10) | 0.78    |

Of the 1868 patients allocated to placebo, 153 died from any cause, 109 had an acute MI, 40 had an acute stroke, and 372 underwent coronary revascularization. HR is per 1-SD increase in the log-transformed value of the biomarker. Each biomarker was analyzed separately.

**Supplemental Table 10.** Adjusted multivariable, multimarker models in the placebo arm

|                  | Model 1<br>Clinical factors +<br>NT-proBNP |         | Model 2<br>Clinical factors +<br>cTnT |         | Model 3<br>Clinical factors +<br>NT-proBNP &<br>cTnT |         | Model 4<br>Clinical factors +<br>NT-proBNP, cTnT,<br>& MR-proANP |         | Model 5<br>Clinical factors +<br>NT-proBNP, cTnT,<br>& MR-proADM |         | Model 6<br>Clinical factors +<br>NT-proBNP, cTnT,<br>MR-proANP, &<br>MR-proADM |         |
|------------------|--------------------------------------------|---------|---------------------------------------|---------|------------------------------------------------------|---------|------------------------------------------------------------------|---------|------------------------------------------------------------------|---------|--------------------------------------------------------------------------------|---------|
|                  | HR<br>(95% CI)                             | P value | HR<br>(95% CI)                        | P value | HR<br>(95% CI)                                       | P value | HR<br>(95% CI)                                                   | P value | HR<br>(95% CI)                                                   | P value | HR<br>(95% CI)                                                                 | P value |
| <b>NT-proBNP</b> | 1.73<br>(1.42-2.12)                        | <0.001  | n/a                                   | n/a     | 1.68<br>(1.35-2.08)                                  | <0.001  | 1.22<br>(0.89-1.68)                                              | 0.21    | 1.58<br>(1.27-1.97)                                              | <0.001  | 1.22<br>(0.89-1.67)                                                            | 0.22    |
| <b>cTnT</b>      | n/a                                        | n/a     | 1.37<br>(1.18-1.60)                   | <0.001  | 1.21<br>(1.02-1.44)                                  | 0.026   | 1.22<br>(1.02-1.45)                                              | 0.027   | 1.15<br>(0.96-1.38)                                              | 0.14    | 1.15<br>(0.96-1.38)                                                            | 0.14    |
| <b>MR-proANP</b> | n/a                                        | n/a     | n/a                                   | n/a     | n/a                                                  | n/a     | 1.59<br>(1.14-2.22)                                              | 0.007   | n/a                                                              | n/a     | 1.50<br>(1.06-2.12)                                                            | 0.021   |
| <b>MR-proADM</b> | n/a                                        | n/a     | n/a                                   | n/a     | n/a                                                  | n/a     | n/a                                                              | n/a     | 1.25<br>(1.04-1.50)                                              | 0.017   | 1.20<br>(0.99-1.44)                                                            | 0.06    |

Each model contains the standard clinical factors used in prior models (age, sex, weight, history of hypertension, history of diabetes mellitus, current tobacco use, prior MI, prior PCI or CABG, systolic blood pressure, estimated GFR, ratio of apoB/apoA, LVEF, aspirin use, beta-blocker use, lipid-lowering medication use) as well as those biomarkers shown with data. HR is for the risk per 1-SD of log-transformed biomarker.

**Supplemental Table 11.** C-statistics in adjusted multimarker models in the placebo arm

|                                            | <b>Without MR-proANP,<br/>MR-proADM, CT-proET-1</b> | <b>With MR-proANP,<br/>MR-proADM, CT-proET-1</b> |
|--------------------------------------------|-----------------------------------------------------|--------------------------------------------------|
| <b>Clinical model<br/>alone</b>            | <b>0.768</b>                                        | <b>0.809</b> <i>P=0.0005</i>                     |
| <b>Clinical<br/>+ NT-proBNP</b>            | <b>0.793</b><br><i>P=0.03</i>                       | <b>0.810</b> <i>P=0.02</i><br><i>P=0.82</i>      |
| <b>Clinical<br/>+ cTnT</b>                 | <b>0.783</b><br><i>P=0.03</i>                       | <b>0.810</b> <i>P=0.007</i><br><i>P=0.49</i>     |
| <b>Clinical<br/>+ NT-proBNP<br/>+ cTnT</b> | <b>0.797</b><br><i>P=0.0004</i>                     | <b>0.810</b> <i>P=0.03</i><br><i>P=0.63</i>      |

Each model contains standard clinical factors (listed in the Methods and in the footnote to Table 3 in the main paper). P values to the right of c-statistics represent the significance of adding MR-proANP, MR-proADM, and CT-proET-1 to the model.

P values below the c-statistics represent the significance of adding NT-proBNP, cTnT or both to the model.

Supplemental Figure 1

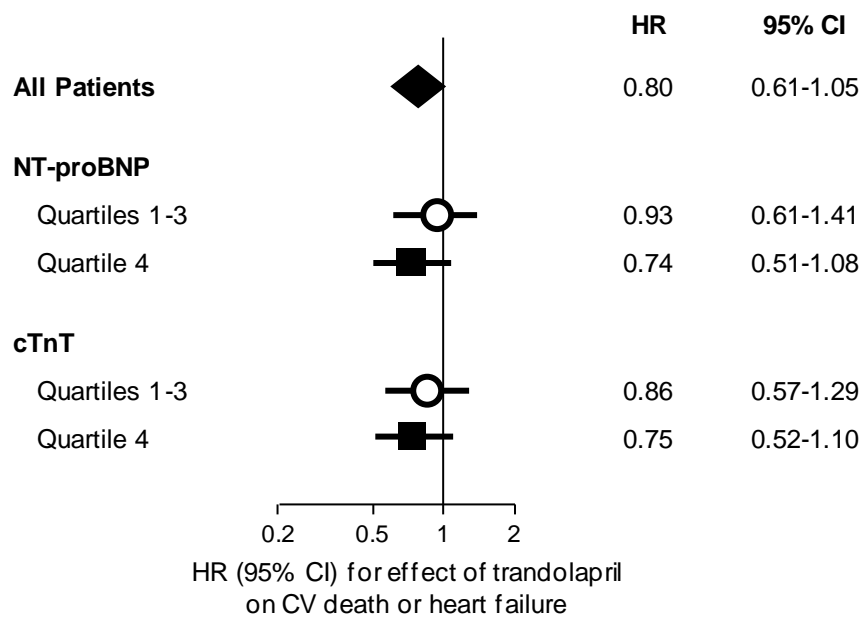

### Supplemental Figure Legend

**Supplemental Figure.** Benefit of trandolapril on the risk of the composite of cardiovascular death or heart failure in 3717 patients from the PEACE trial, categorized as to their levels of biomarkers of cardiovascular stress. Patients are categorized as to whether their level of each biomarker was in the top quartile (quartile 4) or not (quartiles 1-3). The P values for interaction were 0.43 and 0.63 for NT-proBNP and cTnT, respectively. The diamond indicate the effect in the entire biomarker cohort, with the center indicating the point estimate and the left and right ends indicating the 95% CI. The squares and circles indicate the point estimate and the horizontal lines indicate the 95% CIs for the effect in each subgroup.



Supplemental References

1. Masson S, Latini R, Carbonieri E, Moretti L, Rossi MG, Ciricugno S, Milani V, Marchioli R, Struck J, Bergmann A, Maggioni AP, Tognoni G, Tavazzi L. The predictive value of stable precursor fragments of vasoactive peptides in patients with chronic heart failure: data from the GISSI-heart failure (GISSI-HF) trial. *Eur J Heart Fail.* 2010;12:338-347.
